# Supplementary material for: Photoelectrons Mediating Angiogenesis and Immunotherapy through Heterojunction Film for Noninvasive Disinfection
Source: PubMed Central journal article supplement (PMC7507565; doi:10.1002/advs.202000023), 2020-07-25
Supplement: ADVS-7-2000023-s001.pdf [file ADVS-7-2000023-s001.pdf]

## Supporting Information

**Photoelectrons Mediating Angiogenesis and Immunotherapy through Heterojunction Film for Noninvasive Disinfection**

Yuan Li<sup>1</sup>, Xiaomo Xu<sup>2</sup>, Xiangmei Liu<sup>2,\*</sup>, Bo Li<sup>3</sup>, Yong Han<sup>3</sup>, Yufeng Zheng<sup>4</sup>, Da-fu Chen<sup>5</sup>, Kelvin Wai Kwok Yeung<sup>6</sup>, Zhenduo Cui<sup>1</sup>, Zhaoyang Li<sup>1</sup>, Yanqin Liang<sup>1</sup>, Shengli Zhu<sup>1</sup>, Xianbao Wang<sup>2</sup>, Shuilin Wu<sup>1,\*</sup>

**Table S1.** The detail information in blood routine examination at 1 D.

| parameter | Ti+L  | GO/NCDs/Hap/Ti+L | GO/NCDs/Ti+L | unit                |
|-----------|-------|------------------|--------------|---------------------|
| RBC       | 6.231 | 15.083           | 19.706       | 10 <sup>12</sup> /L |
| HGB       | 113.0 | 292.2            | 378.0        | g/l                 |
| HCT       | 39.2  | 94.7             | 121.7        | %                   |
| MCV       | 65.1  | 64.6             | 60.5         | fl                  |
| MCH       | 21.7  | 23.2             | 21.8         | pg                  |
| MCHC      | 312.0 | 333.7            | 336.0        | g/l                 |
| RDW       | 11.5  | 11.3             | 11.1         | %                   |
| PLT       | 617.0 | 969.6            | 1057.7       | 10 <sup>9</sup> /L  |
| MPV       | 4.7   | 5.9              | 5.4          | fl                  |
| PDW       | 15.2  | 14.6             | 14.3         | %                   |
| PCT       | 0.243 | 0.795            | 0.618        | %                   |

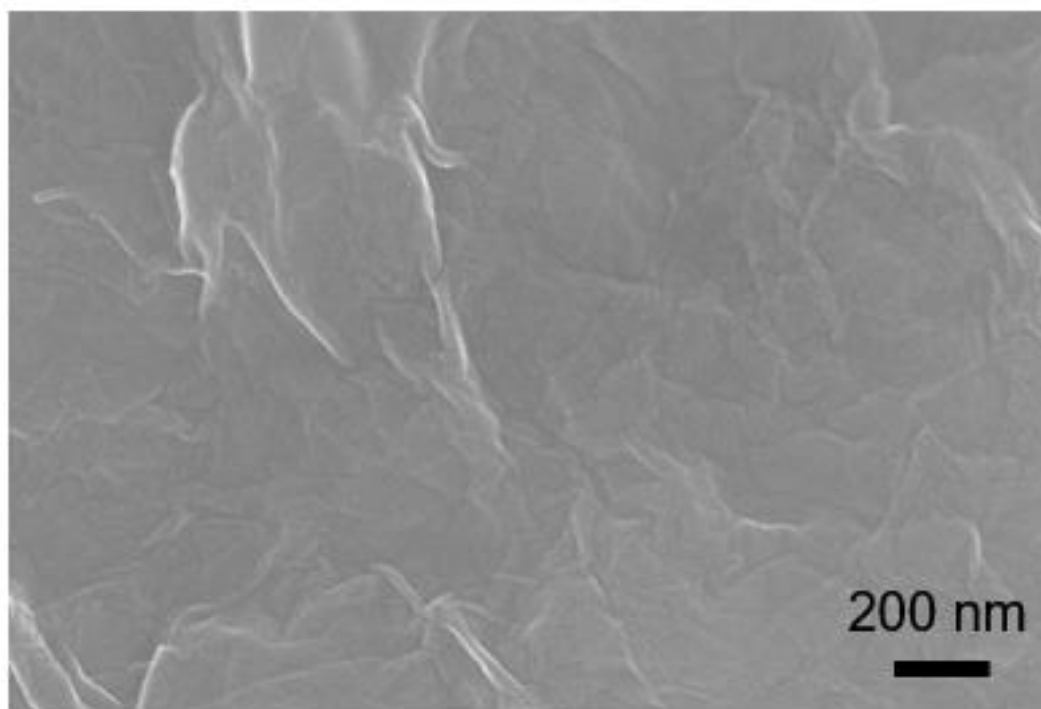

Figure S1. The SEM of GO/NCDs/Ti.

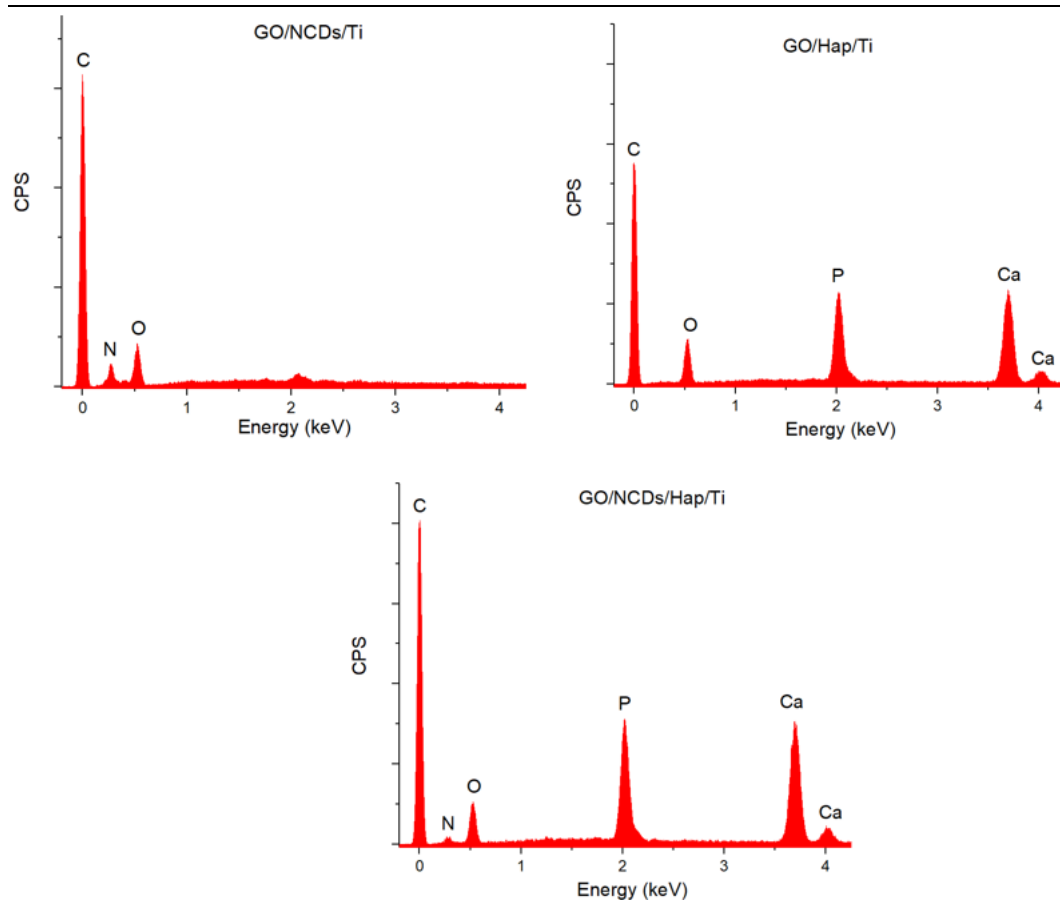

Figure S2. The element EDS of GO/NCDs/Ti, GO/Hap/Ti, and GO/NCDs/Hap/Ti.

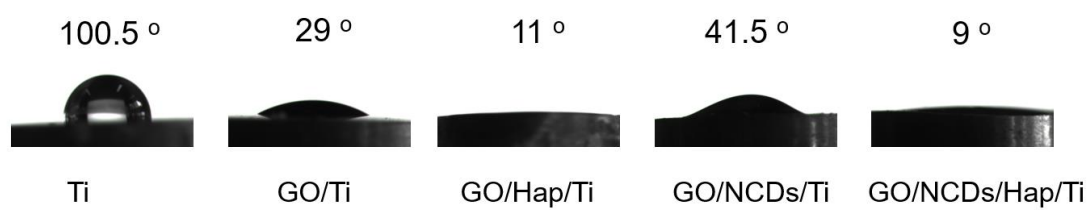

Figure S3. The contact angles of Ti, GO/Ti, GO/NCDs/Ti, GO/Hap/Ti and GO/NCDs/Hap/Ti.

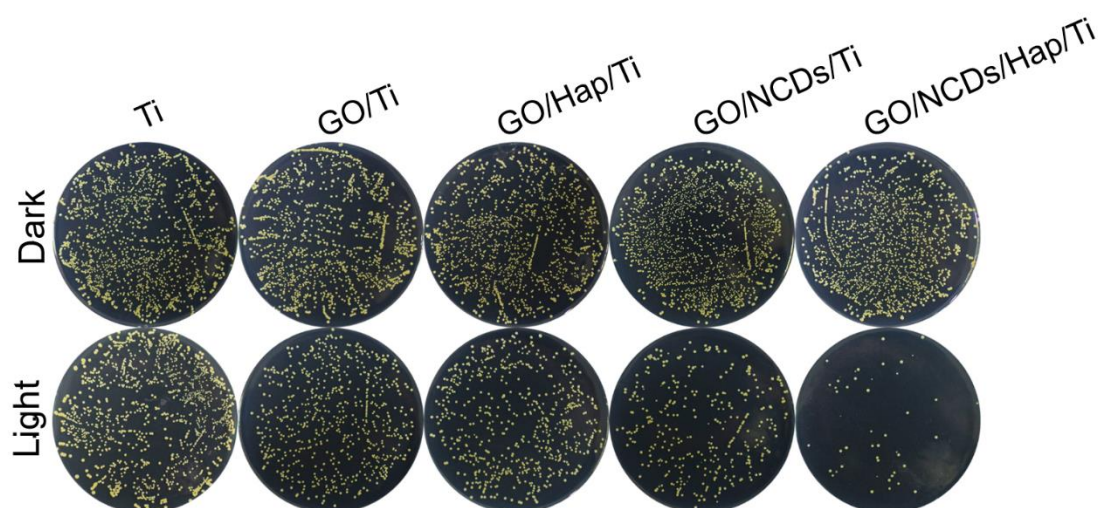

Figure S4. The antibacterial efficiency towards *S. aureus* of Ti, GO/Ti, GO/NCDS/Ti, GO/Hap/Ti and GO/NCDS/Hap/Ti after NIR irradiation for 15 min.

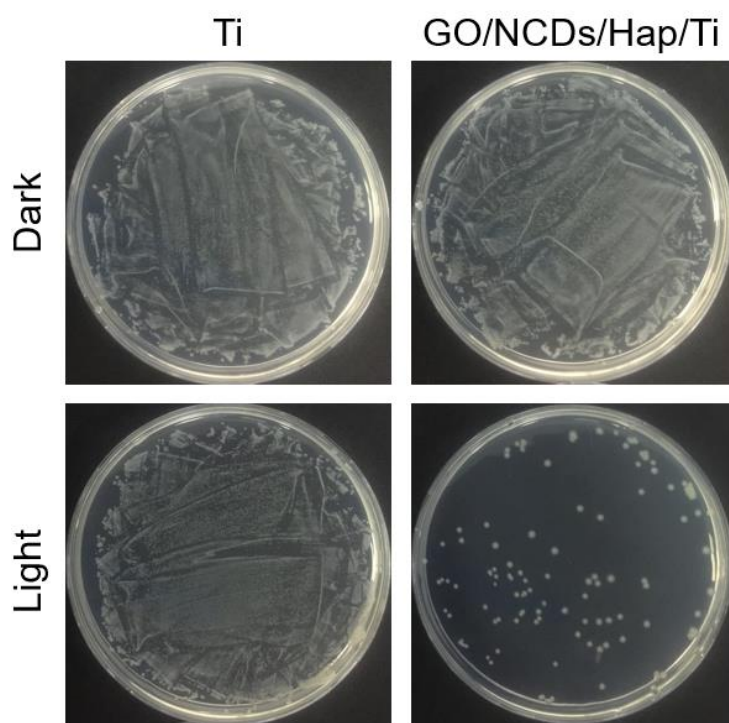

Figure S5. The antibacterial efficiency of Ti, GO/Ti, GO/NCDs/Ti, GO/Hap/Ti and GO/NCDs/Hap/Ti towards *E. coli* after NIR irradiation for 15 min.

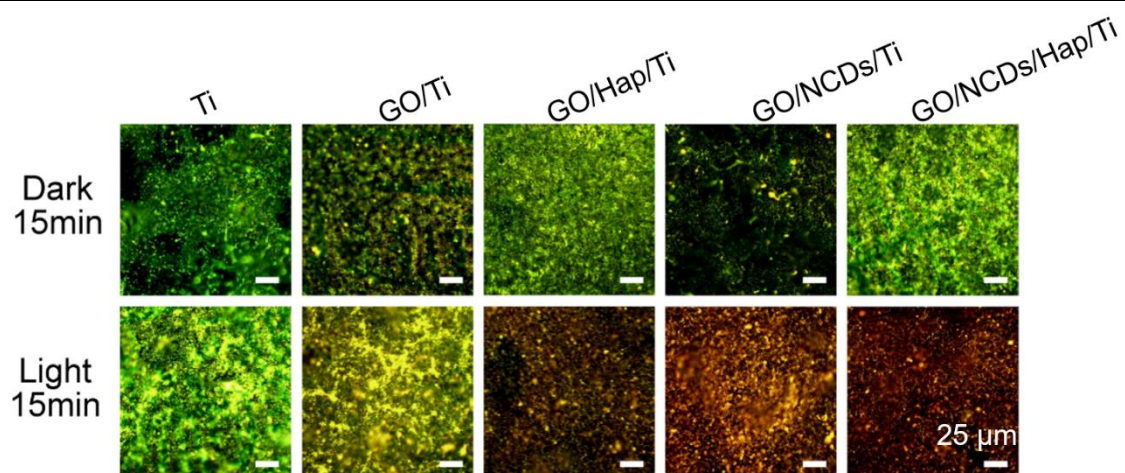

Figure S6. The live-dead fluorescence staining (green indicated live *S. aureus*, red indicated dead *S. aureus*) of Ti, GO/Ti, GO/NCDs/Ti, GO/Hap/Ti and GO/NCDs/Hap/Ti after NIR irradiation for 15 min.

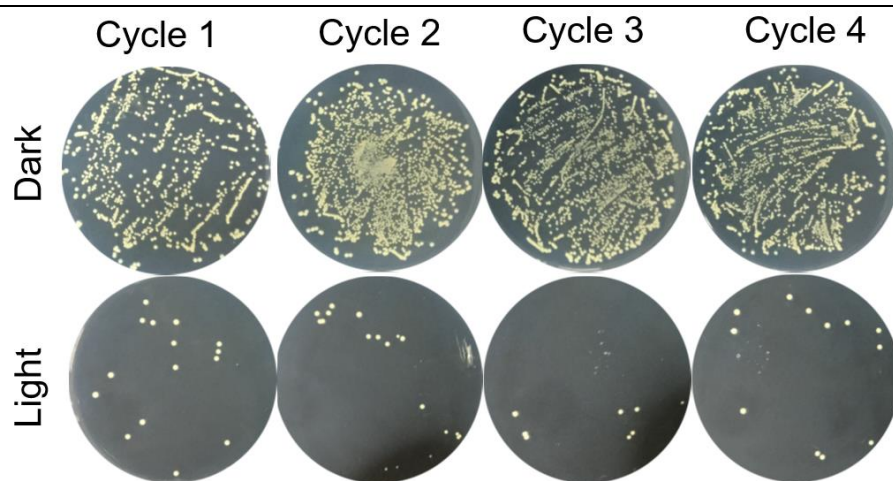

Figure S7. The spread plates of 4 cycles of Ti, GO/Ti, GO/NCDs/Ti, GO/Hap/Ti and GO/NCDs/Hap/Ti after NIR irradiation for 15 min.



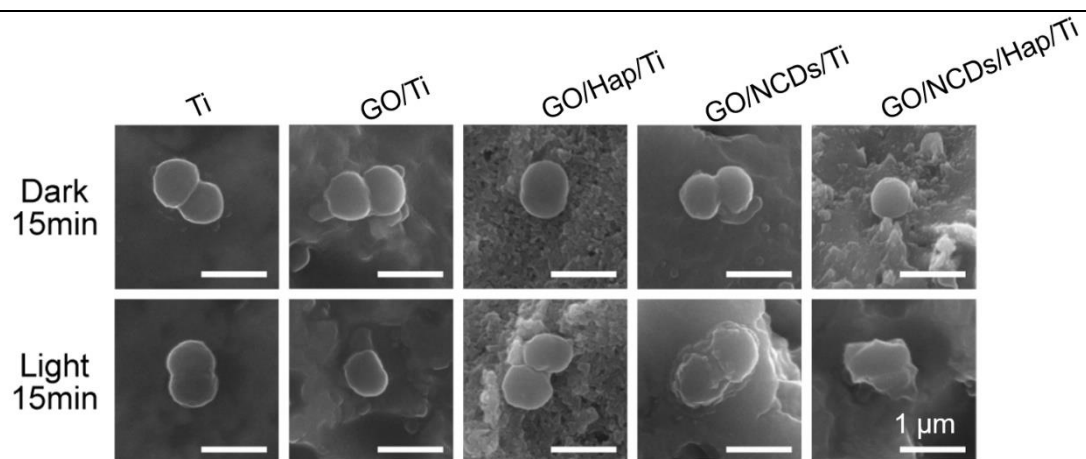

Figure S8. The SEM morphology of *S. aureus* on Ti, GO/Ti, GO/NCDs/Ti, GO/Hap/Ti and GO/NCDs/Hap/Ti after NIR irradiation for 15 min.

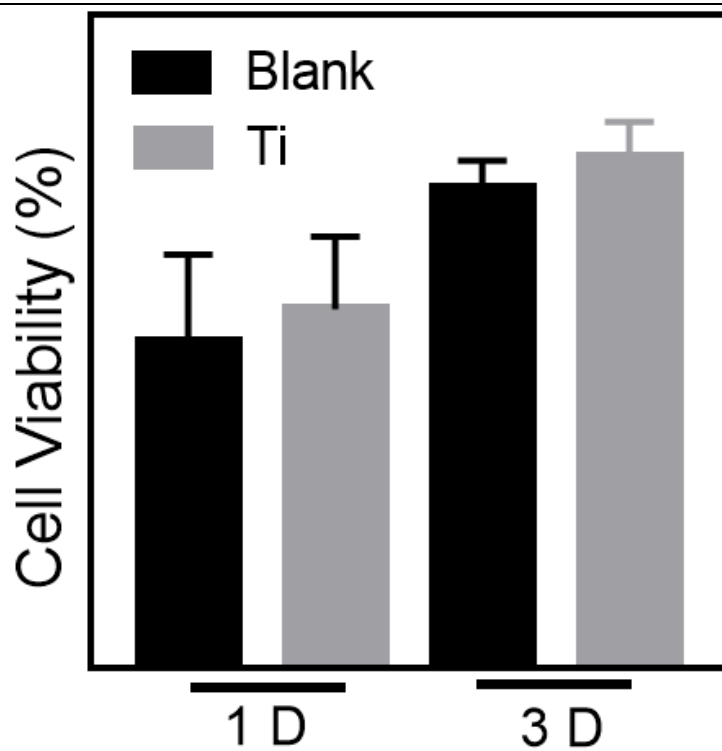

Figure S9. The cell viability of Ti group and the blank group at 1 D and 3 D.

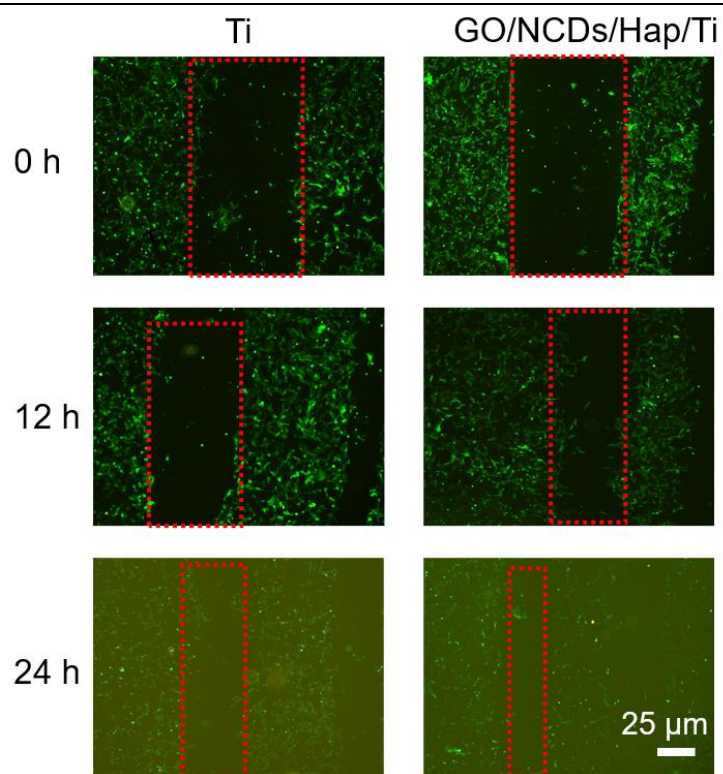

Figure S10. The cells scratch assay of Ti and GO/NCDs/Hap/Ti after NIR irradiation at different incubation time.

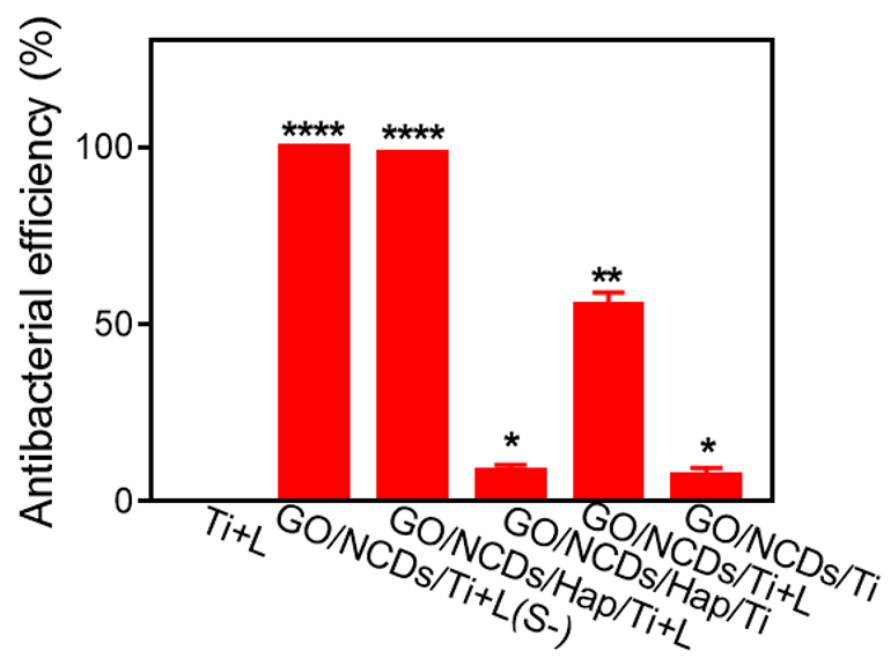

Figure S11. The antibacterial efficiency after NIR irradiation for 15 min *in vivo*.

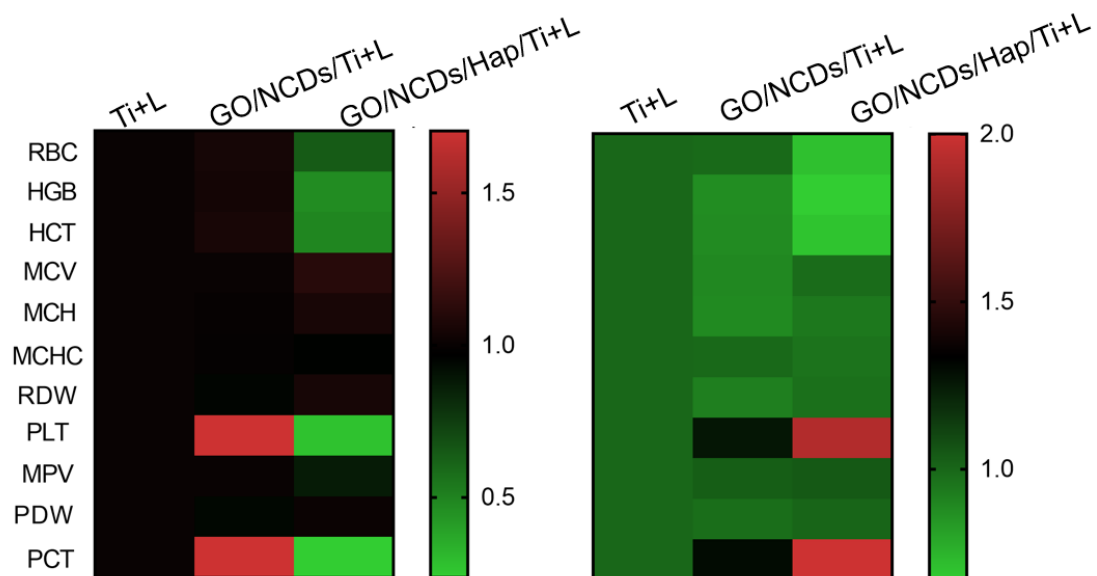

Figure S12. The blood routine examination after NIR irradiation for 15 min at 2 D (left) and 3 D (right) *in vivo*.

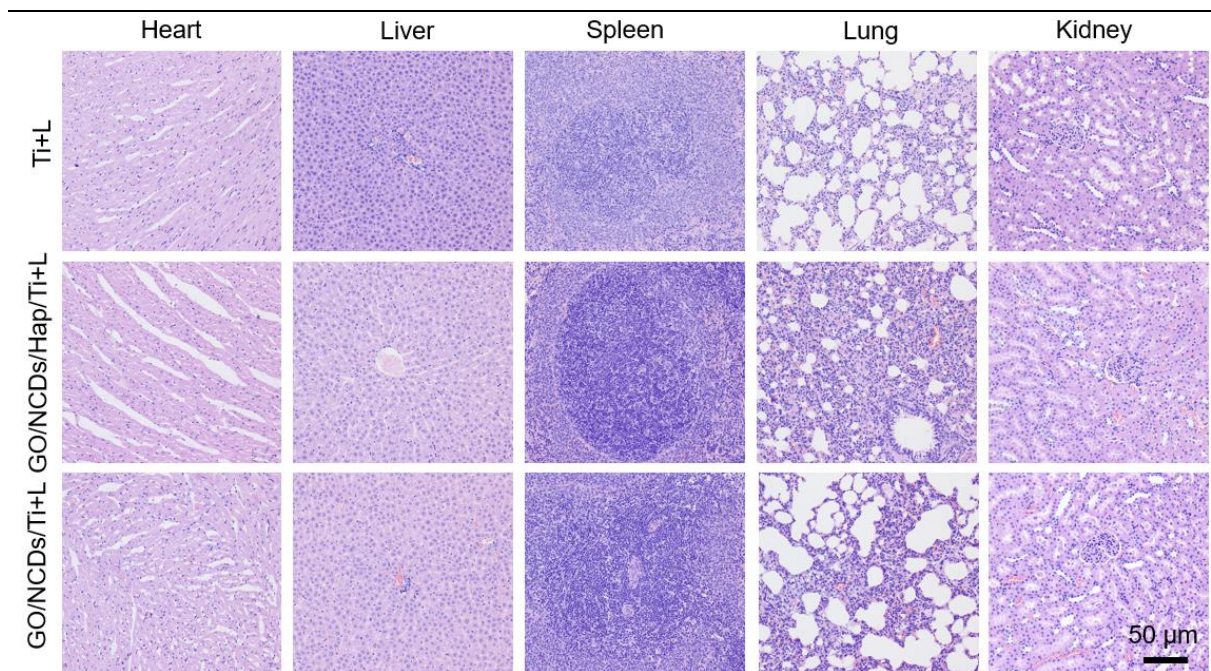

Figure S13. The H&E staining of main organs at 3 D treatment *in vivo*.

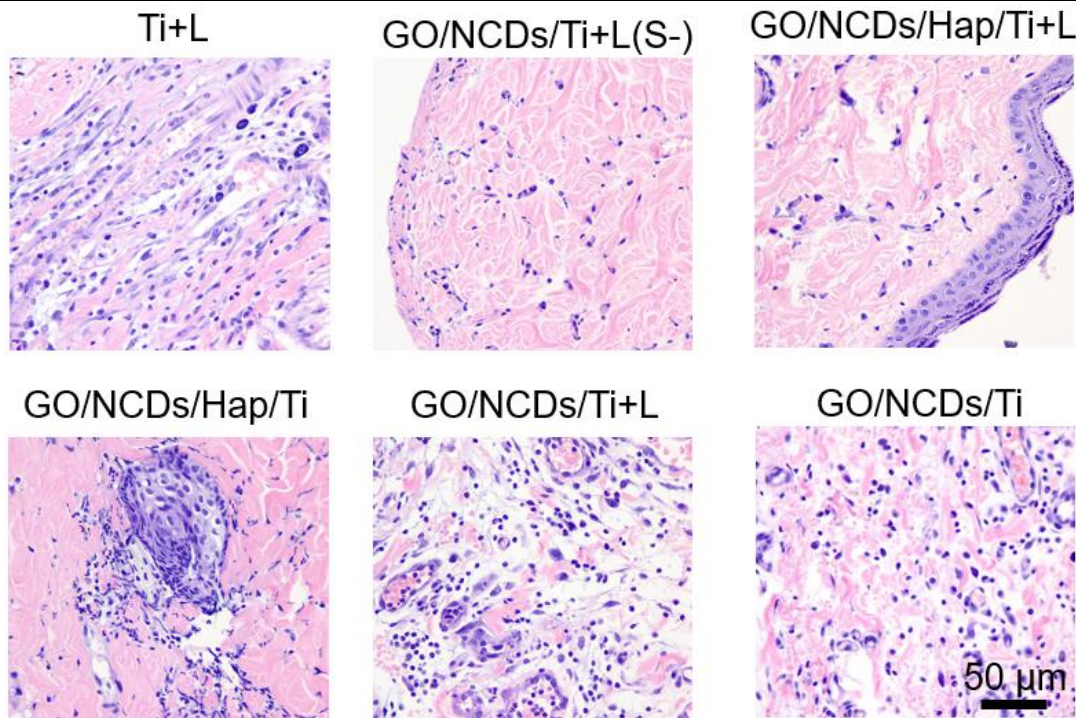

Figure S14. The H&E staining of infected tissues at 3 D treatment *in vivo*.



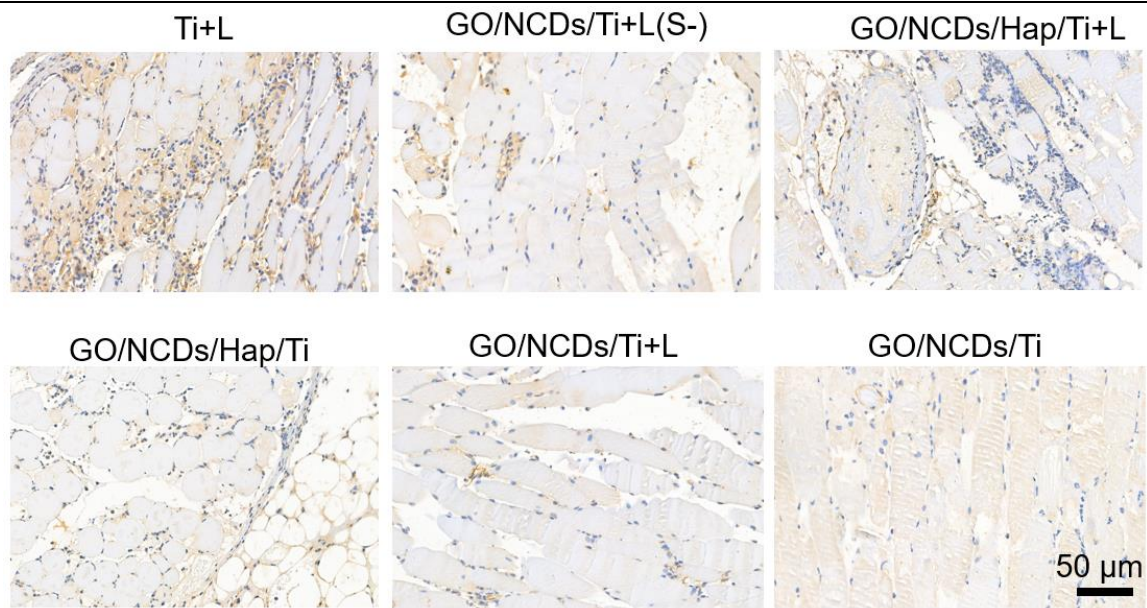

Figure S15. The immunohistochemical of infected tissues at 3 D treatment *in vivo* stained by CD31.



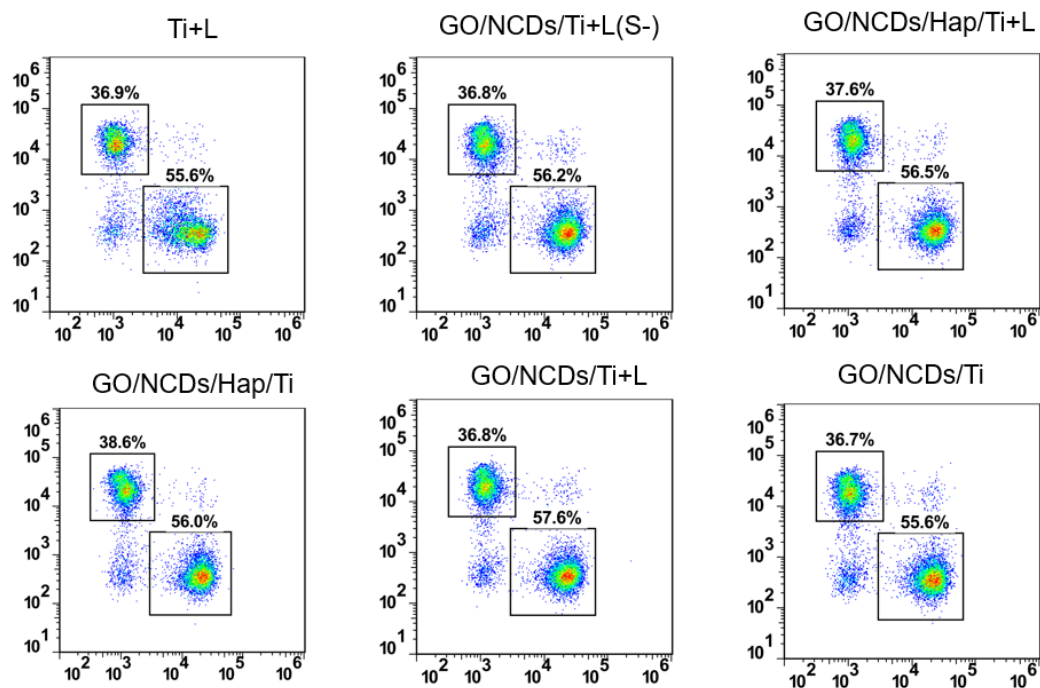

Figure S16. The flow cytometry of CD4 and CD8 lymphocyte in the tissue after irradiation for 3 D.

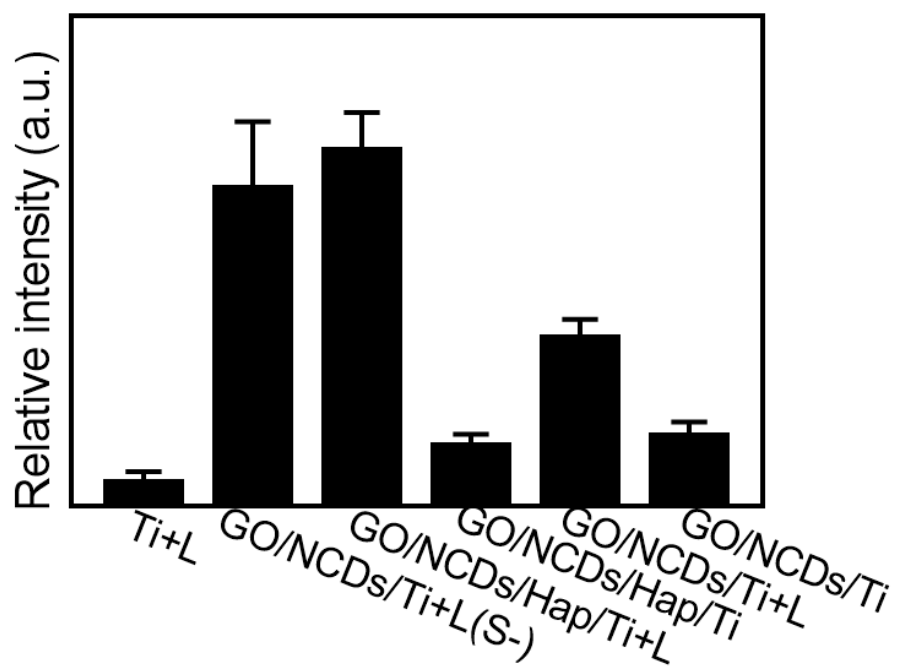

Figure S17. The data about neutrophil granulocyte at 3 D
